1 Alejandro Sosnovsky<sup>1\*</sup>, Mailén Elizabeth Lallement<sup>1</sup>, Magalí Rechenq<sup>1</sup>, Eduardo Enrique Zattara<sup>1</sup>, María  
2 Valeria Fernández<sup>1</sup>, María José Suárez<sup>3</sup>, Sergio Leiva<sup>2</sup> and Rodolfo Juan Carlos Cantet<sup>3</sup>

3

4 Title: Topography and Land Use Modulate Hydrological and Nutrient Export Dynamics in  
5 Andean Streams

6 Short Title: Hydrology and Nutrient exports in Andean streams

7

8

9 <sup>1</sup>Grupo de Evaluación y Manejo de Recursos Ícticos, INIBIOMA, CONICET-Universidad Nacional del  
10 Comahue, Quintral 1250, R8400FRF San Carlos de Bariloche, Argentina

11 <sup>2</sup>Grupo de Nuevos Materiales y Dispositivos, Comisión Nacional de Energía Atómica Av. Ezequiel Bustillo Km  
12 9.5 (8400) San Carlos de Bariloche, Argentina

13 <sup>3</sup>Departamento de Producción Animal, Facultad de Agronomía, Universidad de Buenos Aires, e INPA,  
14 CONICET. Av. San Martín 4453, C1417DSQ Ciudad Autónoma de Buenos Aires, Argentina

15 \* Corresponding autor e-mail address: [alejandro.sosnovsky@comahue-conicet.gob.ar](mailto:alejandro.sosnovsky@comahue-conicet.gob.ar)

16 Telephone number: +54 294 423374 (452), Fax number: 0054-2944-422111

17

18

## 19 **ACKNOWLEDGMENTS**

20 We thank Rio Negro's province Water Department and Argentina's National Weather Service for providing  
21 hydrological and meteorological data; and D.S. Ahearn for his interesting comments during the data analysis and  
22 writing periods. This study was funded by *Agencia Nacional de Promoción Científica y Tecnológica* (PICT  
23 2959). Lallement, M. E. has a National Scientific and Technical Research Council (CONICET) postdoctoral  
24 fellowship. Sosnovsky, A, Cantet, R.J., Rechenq, M., Fernandez, M.V. and Zattara E.E. are CONICET  
25 researchers.

26

27

28 **ABSTRACT**

29 Waterways act as integrators of ecosystems, their dynamics driven by multiple environmental factors and scales.  
30 To elucidate factors affecting hydrological and nutrient dynamics in Andean streams, we characterized two  
31 adjacent North Patagonian streams with contrasting drainage basins: Casa de Piedra (CP), originating in a small  
32 mountain lake and running through a pristine landscape, and Gutiérrez (G), originating in a large piedmont lake  
33 and running through an anthropized landscape. The drainage basins share both temperature and precipitation  
34 regimes; however, the streams presented contrasting hydrological dynamics and nutrient export values. CP had  
35 higher discharge flashiness with shorter response delays to precipitation, while G showed more stable  
36 hydrograms, a difference explained by buffering from a large upstream lake in G's basin. Streams showed  
37 differences in the quality and timing of coarse particulate organic matter export and basal export levels of  
38 phosphorus and nitrogen that could be explained by human activities affecting G but not CP. Moreover,  
39 nitrogen:phosphorus ratio indicates a possible shift to phosphorus as the limiting nutrient in the future in G  
40 drainage basin. In summary, our results show that even under a common climatic regime, dynamics of adjacent  
41 basins can be strongly driven by topographic and land use factors.

42

43

## 44 **INTRODUCTION:**

45 River ecosystems have traditionally been studied as isolated entities; however, over time it has become clear that  
46 they are deeply intertwined with their surroundings (Likens 1985). Climate, topography, geology and land cover  
47 are environmental factors that control spatial patterns in these ecosystems through often hierarchical influence  
48 (Snelder & Biggs 2002). In other words, a river is the product of its landscape (Wiens 2002) and thus riverine  
49 hydrological, chemical and biological processes should be studied in relation to the river's overall drainage basin  
50 (Hynes 1975; Vannote et al. 1980).

51 Regional climate and drainage basin topography are factors acting at a macro and meso spatial scales  
52 upon the river ecosystem, strongly driving hydrological and chemical dynamics (Snelder & Biggs 2002).  
53 Climate directly drives the hydrological cycle, determining stream discharge, a key ecosystem variable.  
54 Discharge is fed by rain, snowmelt and groundwater, the relative importance of these factors varying over time  
55 and space (Brown et al. 2003). After a rain episode, surface and sub-surface run-off are favored at mountainous  
56 landscapes, while water infiltration and evapotranspiration are favored at highly vegetated lowlands with  
57 permeable soils. Snowfall at high altitudes contributes to formation of a snowpack, which will store water until  
58 the melt period, when this water flows down into a stream (Bailey 1995). Lakes are also topographic features of  
59 a drainage basin that can attenuate run-off response and sediment transport (Snelder & Biggs 2002). Thus,  
60 headwater lakes influence directly the hydrograph and sediment dynamic of downstream fluvial ecosystems  
61 (Gordon et al. 2004). These hydrographs tend to be stable over time, furthermore, considering lakes as sediment  
62 and nutrient traps, low values of nutrient concentration and export could be expected in these streams (Parker et  
63 al. 2009).

64 At a lower spatial scale, drainage basin traits also affect fluvial dynamics, since nutrients and  
65 contaminants generated at the basin eventually reach the river ecosystem (Allan 2004; Dodds & Smith 2016).  
66 Non-point source pollution, associated with changing land use patterns and practices, has resulted in increased  
67 impacts on water bodies (Jordan et al. 1997; Carpenter et al. 1998). For example, growth of urban areas favors  
68 nutrient export (Howarth et al. 1996; Meyer et al. 2005; Walsh et al. 2005). Moreover, direct dumping of sewage  
69 water to a stream greatly increases nutrient load (Pieterse et al. 2003) and can also change nutrient stoichiometry  
70 (Merseburger et al. 2005). Thus, increases of nutrient load leading to eutrophication of running waters and  
71 carbon dynamics largely depend on the drainage basin state.

72 In Northern Patagonia, climate and topography are largely determined by the Andes mountain range  
73 (Paruelo et al. 1998). According to the updated world map of the Köppen-Geiger climate classification, Northern

74 Patagonia is characterized by a temperate climate with warm and dry summers (Peel et al. 2007). The Andes  
75 represent an important barrier for humid air masses brought from the Pacific Ocean by westerly winds. Most of  
76 the humidity in these maritime air masses precipitates on the west side of the Andes as they are blown to higher,  
77 colder altitudes across the mountain range. Upon crossing the Andes, the air descends along their east side and  
78 becomes hotter and drier through adiabatic warming. East of the Andes, the amount of rainfall follows a steep  
79 west-east gradient: annual precipitation drops from 3500 mm to 700 mm in less than 60 km. Moreover, the  
80 precipitation regime shows marked seasonality, with most rain falling during fall and winter (Paruelo et al.  
81 1998). Thus, in this mountain region, the hydrological regime of fluvial ecosystems can be divided into three  
82 contrasting periods (Sosnovsky et al. 2019): 1) a storm period, in which stream discharge variability and water  
83 turbidity are high due to high run-off and the interaction between land and river ecosystems; 2) a snowmelt  
84 period, with highest stream discharge and electrical conductivity (EC) dilution values; and 3) a dry period, with  
85 overall low stream discharge values and stronger influx from groundwater.

86 North Patagonian drainage basins along the East side of the Andes are in a relatively pristine state. In  
87 this region, many river systems originate from high-altitude wetlands and small lakes, or large piedmont lakes.  
88 Human population density is low, and native forest occupies the western, most humid zone while steppe  
89 vegetation occupies the eastern zone (Mermoz & Martín 1987). Forests are dominated by the genus *Nothofagus*  
90 (southern beeches) and Andean cypress species *Austrocedrus chilensis*, but other deciduous and evergreen  
91 species of high ecological and commercial value are present (Veblen et al. 1996). As in other South American  
92 temperate forests, N deposition is remarkably low (Holland et al. 1999), and vegetation is limited mainly by N  
93 (Diehl et al. 2003). Soils are classified as Andisols, which are characterized by high capacity to stabilize organic  
94 matter, store water and retain phosphorous (Satti et al. 2003). They also have a high pH buffering capacity. Work  
95 carried out in these drainage basins has revealed the oligotrophic character of the fluvial ecosystems (Pedrozo et  
96 al. 1993). Diverse authors have studied anthropic (Miserendino et al. 2016) and natural (Lallement et al. 2016;  
97 Williams Subiza & Brand 2018) elements that have affected Andean drainage basins, and consequently, their  
98 fluvial ecosystems. Some of these effects are sustained on chemical and biological structure over time (Carrillo  
99 et al. 2018). Recent research has revealed the dynamics of organic matter, which is intimately associated with the  
100 stream-basin interaction (García et al. 2015b; Díaz Villanueva et al. 2016; García et al. 2018). Nevertheless,  
101 studies focusing on stream discharge (Masiokas et al. 2008; Barros & Camilloni 2016; Sosnovsky et al. 2019)  
102 and, nutrient load or export (Oyarzún et al. 1998; Oyarzún et al. 2004; Temporetti 2006) are scarce; despite the  
103 hydrological, ecological and human importance of these variables. Even scarcer are studies where natural

104 processes and undisturbed nutrient cycling can be assessed in pristine ecosystems (Hedin et al. 1995) like the  
105 ones can be found in North Patagonian region.

106 The main hypothesis of our study is that climate is the principal driver of stream ecosystems dynamics,  
107 which are in turn modulated by topography and land use. As a consequence, we expect precipitation, air  
108 temperature and stream discharge to be intimately connected. In turn, adjacent drainage basins with contrasting  
109 topography and land use should present differences in their hydrological, physical and chemical dynamics. To  
110 test this hypothesis, we selected two streams located in adjacent yet contrasting drainage basins: Casa de Piedra  
111 (CP) and Gutiérrez (G). CP drainage basin is pristine, and the stream originates in a high-mountain lake. G  
112 drainage basin suffers from significant anthropization, and the stream originates from a large piedmont lake. On  
113 one hand, we expect to find buffered hydrological and chemical dynamics in G, relative to CP. On the other,  
114 higher anthropization of G's basin could impact the stream ecosystem, potentially causing elevated or  
115 unpredictable variability in discharge regime along with increase nutrient concentration and export. Our first  
116 goal is to compare discharge variability of CP and G, and study how discharge relates to climatic variables (basin  
117 precipitation and air temperature). Our second goal is to determine the trophic state of these two streams, by  
118 measuring basal concentration, export and stoichiometry of nitrogen (TN: total N) and phosphorous (TP: total P),  
119 and estimate basal export of coarse particulate organic matter (CPOM, organic matter > 1mm). Our third  
120 objective is to identify seasonal patterns of key physical and chemical variables.

121

## 122 **MATERIALS Y METHODS**

### 123 **Study area**

124 Research was conducted at the drainage basin of the streams Casa de Piedra (CP; 41° 07' 30.11" S 71° 27'  
125 13.16"W) and Gutiérrez (G; 41° 09' 36.18" S 71° 24' 37.19"W), both located in Nahuel Huapi National Park,  
126 Rio Negro, Argentina (Fig. 1). These drainage basins are very different from each other, despite of their  
127 proximity (Table 1). CP's basin covers 63 km<sup>2</sup> and the stream originates in lake Jakob, a small (0.15 km<sup>2</sup>), ultra-  
128 oligotrophic (1-3 µg l<sup>-1</sup> TP), high altitude water body situated at 1550 m a.s.l. (García et al. 2015a). CP's only  
129 perennial affluent is the Rucaco stream, which originates at a high-altitude wetland. CP flows 19.7 km through a  
130 steep V-shaped valley (average slope: 33.9 m km<sup>-1</sup>) from most of its length. CP's drainage basin is mostly  
131 pristine, with human activities restricted to hiking and infrequent camping; human population (less than 1000  
132 inhabitants, 2010 National Census) is restricted to lowland areas. Forest below the tree line includes deciduous  
133 *Nothofagus pumilio* and evergreens *N. dombeyi* and *Austrocedrus chilensis*. In contrast, G's drainage basin is

134 larger (160 km<sup>2</sup>), and the stream originates in lake Gutiérrez, a deep (111 m maximum depth) and large (17 km<sup>2</sup>)  
135 water body that occupies ~11% of the basin's area. The seasonal concentration of TP is 3.4 µg l<sup>-1</sup> on average  
136 (Diaz et al. 2007). G's only perennial affluent is the Cascada stream, whose catchment covers 12.5 km<sup>2</sup> and  
137 includes a major summer and winter sports resort. G flows 9 km through a wide, gently sloped valley (5.9 m km<sup>-1</sup>)  
138 <sup>1</sup>). Its riverbanks are extensively colonized by the exotic crack willow, *Salix fragilis*, and pass through a series of  
139 populated areas (approximately 4000 inhabitants, 2010 National Census) belonging to the city of San Carlos de  
140 Bariloche (approximately 108000 inhabitants, 2010 National Census). In addition, two trout farms with a total  
141 production of ~3 tons year<sup>-1</sup> use G's waters. In summary, CP's basin is largely free of impact from human  
142 activities, while G's basin is not.  
143

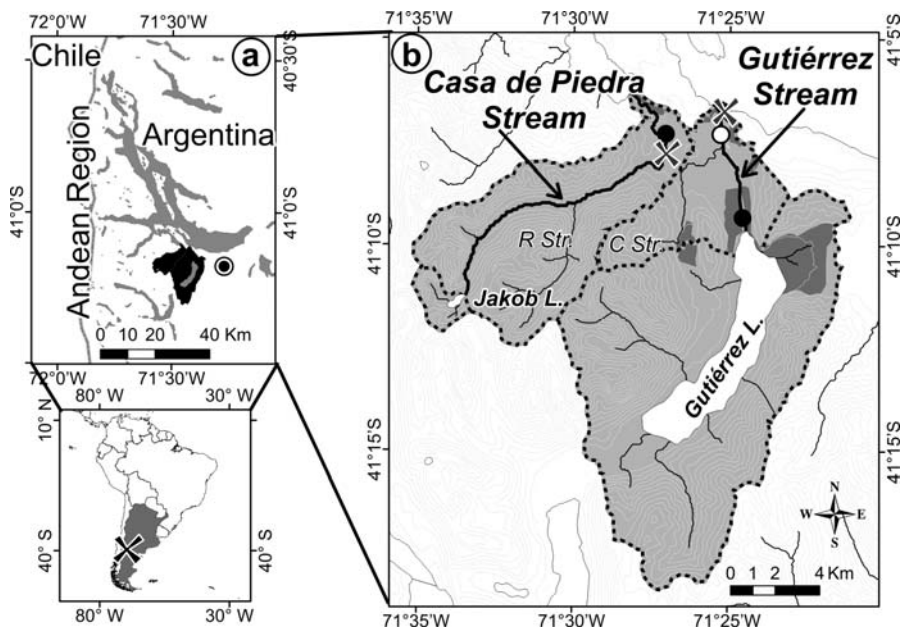

144  
145 **Fig. 1** a) Nahuel Huapi National Park; the study site is shaded in black. The city marker indicates San Carlos de  
146 Bariloche downtown. b) Study area, Casa de Piedra and Gutiérrez drainage basins, Jakob lake and Gutiérrez lake  
147 sub-catchments are also delimited. Curves represent 100 m slope on the terrain. Populated zones are shown in  
148 grey, crosses indicate sampling sites, black circles indicate the Limnigraphic stations and white circle indicate  
149 the rain meter location. R Str. and C Str., Rucaco and Cascada streams (modified from Sosnovsky et al. 2019).  
150

### 151 **Data collection**

152 The present study was carried out over a period of one year, from March 2013 to March 2014. Data on rainfall  
153 and discharge was kindly provided by the Rio Negro province's Water Department. Daily precipitation was  
154 recorded with a rain meter (Fig. 1), and did not differentiate between rain and snow. Discharge data were  
155 average daily records from limnigraphic stations. CP's limnigraphic station is located close to its mouth, while

156 G's station is located at its source (Fig. 1). Values of discharge at our G sampling site were estimated as  
 157 discharge as measured at the station plus discharge for the Cascada stream, determined using the Drainage-Area  
 158 Ratio method (Emerson et al. 2005); based on the specific daily values of discharge for the adjacent CP stream.  
 159 Specific discharge ( $Q^{sp}$ ) was defined as discharge per unit area. Daily average air temperature records were  
 160 obtained from the National Weather Service.

|                                  | Casa de Piedra  | Gutiérrez    |
|----------------------------------|-----------------|--------------|
| Drainage area (km <sup>2</sup> ) | 63.9 (60.3)     | 160.4 (30.1) |
| Lake area (km <sup>2</sup> )     | 0.15            | 17.21        |
| Native Forest (%)                | 60.2 (61.7)     | 61.1 (56.3)  |
| Bare ground (%)                  | (27.7) 29.7     | (9.5) 17.2   |
| Exotic Forest (%)                | (10.5) 9.9      | 10.8 (34.2)  |
| Habitants [N]                    | < 1000 (< 1000) | 4900 (4000)  |
| Urban area [km <sup>2</sup> ]    | 0.65 (0.65)     | 11.35 (5.08) |

161 **Table 1** Drainage basins characteristics. The values are expressed based on the entire area of the drainage basins,  
 162 values in brackets exclude the sub-catchment area of the Jakob lake and Gutiérrez lake.

163

164 Baseline levels of nutrients and relevant physical and chemical variables were obtained from monthly sampling  
 165 at both streams (Fig. 2). Water samples were taken to analyze total phosphorus (TP) and total nitrogen (TN)  
 166 concentrations. Water turbidity was measured with a Velp turbidimeter. Temperature, electrical conductivity  
 167 (EC) at 25 °C and pH were measured with an Oakton probe. Coarse particulate organic matter (CPOM) was  
 168 sampled with 2 drift nets (1-mm, 20 X 20-cm opening at the mouth) that were staked in the streambed and left to  
 169 collect material for intervals of 10 to 200 minutes, depending on the amount of CPOM present in the stream.  
 170 During October, high and fast stream discharge prevented us from placing Surber sampler nets at G, so we  
 171 performed linear interpolation for this value. Data were taken exclusively on days without precipitation.

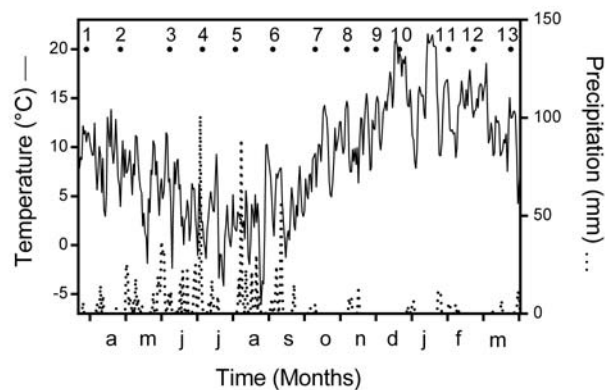

172

173 **Fig. 2** Temperature and precipitation during the study period. Black dots and numbers indicate sampling

174 dates

## 175 **Data processing and analysis**

### 176 *Discharge*

177 To understand the dynamics of discharge, we used an autocorrelation analysis (Mangin 1984) and calculated  
178 Richard- Baker (R-B) index (Baker et al. 2004). The autocorrelation analysis examines how a value depends on  
179 preceding values over a period of time. The correlations are computed for a given lag time  $k$  to obtain an  
180 autocorrelation coefficient  $r(k)$ . For example, the correlation between today's and yesterday's stream discharges  
181 would be a lag-1 autocorrelation coefficient,  $r(1)$ . The autocorrelation function is represented with a  
182 correlogram, where slope is determined by the response of the system to an event. If the event has only a short-  
183 term influence on the response of the discharge, the slope of the correlogram will decrease steeply. In contrast, if  
184 the system is influenced by an event for a long time, the slope of the correlogram will decrease slowly. Generally  
185 the length of the influence of an event is given by the "memory effect" which is according to Mangin (1984) the  
186 lag number  $k$  when  $r(k)$  reaches a value of 0.2. For this purpose, data on the average daily discharge were  
187 transformed to normality by the Box-Cox procedure as suggested by Peltier et al. (1998). The formula for  
188 autocorrelation is (Mangin 1984; Larocque et al. 1998):

189

$$r(k) = \frac{C(k)}{C(0)}$$

190 with

$$C(k) = \frac{1}{n} \sum_{t=1}^{n-k} (x_t - \bar{x})(x_{t+k} - \bar{x})$$

191

192

193 Where  $k$  is the time lag and varies from 0 to  $n$ . According to Mangin (1984),  $n$  has to be taken as 1/3 of the  
194 whole dataset to avoid stability problems.

195 The annual variability in stream discharge (flashiness) was measured by the R-B index as follows:

196

$$R - B \text{ Index} = \frac{\sum_{i=1}^n |q_i - q_{i-1}|}{\sum_{i=1}^n q_i}$$

197



198 The variable  $q$  is the mean daily discharge whereas  $n$  is the number of observations. This index measures  
199 oscillations in discharge relative to total discharge. Thus, it is a dimensionless measure ranging between 0 and 2  
200 (Fongers et al. 2012). A value of 0 represents an absolutely constant discharge; increased R-B index values  
201 indicate increased flashiness of streamflow. As such, the index appears to provide a useful characterization of the  
202 way drainage basins process hydrological inputs into their streamflow outputs.

203 In addition, we studied the relationship between discharge, precipitation and temperature by cross-  
204 correlation analysis. This analysis is widely used to analyze the linear relationship between input and output  
205 signals in hydrology (Larocque et al. 1998). In this case, input signals were precipitation and temperature, and  
206 output signal was river discharge of CP and G streams. Cross-correlations are represented by a cross-  
207 correlogram. The maximum amplitude and the lag value of the cross-correlogram provide information on the  
208 delay, which indicates the time of the pulse transfer to the stream. According to Larocque *et al.* (1998) the  
209 formula for cross-correlation is:

210

$$r_{xy} = \frac{C_{xy}(k)}{\sigma_x \sigma_y}$$

211 with

$$C_{xy}(k) = \frac{1}{n} \sum_{t=1}^{n-k} (x_t - \bar{x})(y_{t+k} - \bar{y})$$

212

213 Where  $\sigma_x$  and  $\sigma_y$  are the standard deviation of the two times series.

214 *Physical and chemical analysis*

215 We estimated concentration and export of nutrients (TN and TP) and CPOM. TN was analyzed through digestion  
216 and subsequent reduction in cadmium column (Grasshoff et al. 1983). TP was analyzed using acid digestion  
217 followed by evaluation of solubilized phosphorus as soluble reactive phosphorus (A.P.H.A. 2005). We estimated  
218 Ash Free Dry Weight of the CPOM using the Pozo et al. (2009) methodology. The annual export of TN, TP and  
219 CPOM were calculated by the following formula:

220

221

222

$$\text{Nutrient export} = \frac{[N] Q t}{A}$$

223

224 Where  $[N]$  is nutrient concentration,  $Q$  is discharge,  $t$  is time and  $A$  is drainage basin area.

225

226 We performed a paired T-test to compare nutrient concentration and export between streams; to this end the data  
227 were transformed to comply with normality and homoscedasticity assumptions. Last, we performed a Principal  
228 Component Analysis (PCA) that included 12 variables: turbidity, temperature, EC, pH, discharge, TP, TN, TN  
229  $TP^{-1}$ , CPOM, TP export, TN export and CPOM export. PCs were calculated based on standardized correlation  
230 matrix, using components with eigenvalues larger than 1. Number Cruncher (Hintze 1998) and InfoStat (Di  
231 Rienzo et al. 2016) were employed for statistical analysis, GraphPad Prism version 6.01 was employed for  
232 graphics editing.

233

## 234 **RESULTS**

### 235 **Climate and hydrology of the region**

236 Air temperature and precipitation in the study area agreed with a temperate climate. Air temperature was low  
237 between May and August and increased monotonically after September, reaching its highest values from  
238 December to February. Annual precipitation was 1164 mm and showed strong seasonality, with 80% falling  
239 between mid-May and mid-September. The first two (#1-2) and last three (#11-13) samples thus took place  
240 during a drier period; samples #3-6 were taken during the precipitation period; the remaining samples (#7-10)  
241 fell within the period of monotonic air temperature warming (Fig. 2). Thus, samples were evenly distributed  
242 across three climatically contrasting periods.

243 The flow regime was contrasting between the streams. CP had a lower annual average discharge value  
244 than G (Discharge<sub>CP</sub> = 3.357 m<sup>3</sup>/s; Discharge<sub>G</sub> = 4.627 m<sup>3</sup>/s;  $t = -7.4437$ ;  $P < 0.0001$ ; d.f. = 704), but its  $Q^{sp}$  was  
245 higher ( $Q^{sp}_{CP} = 0.051$  m<sup>3</sup>/s;  $Q^{sp}_G = 0.029$  m<sup>3</sup>/s;  $t = 28.9156$ ;  $P < 0.0001$ ; d.f. = 487). CP presented the most extreme  
246 discharge values (Fig. 3a): the R-B index was 0.143 for CP, compared to 0.031 for G, indicating that the average  
247 day-to-day fluctuations of streamflow were 14.3 % and 3.1 %, respectively. Furthermore, CP showed a steep  
248 autocorrelation function with a memory effect at  $k = 38$ , while G revealed a more gently sloped function with a  
249 memory effect at  $k = 61$  (Fig 3b). Thus, CP showed higher flashiness and lower memory (i.e., temporal  
250 persistence) than G.

251

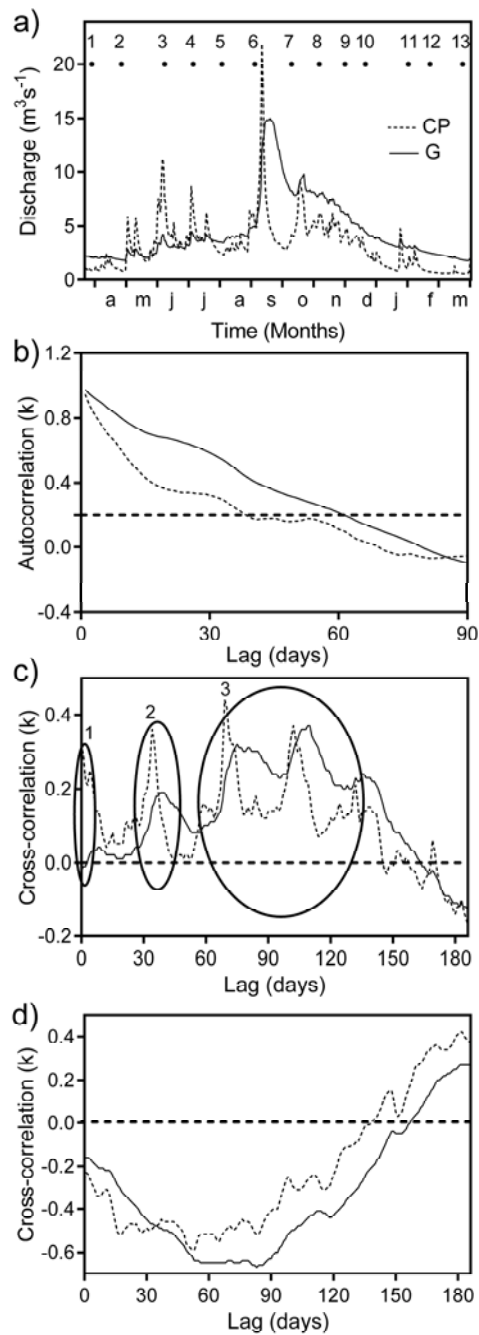

252

253 **Fig. 3** a) Hydrographs of Casa de Piedra (CP) and Gutiérrez (G) streams, black dots and numbers indicate  
254 sampling dates. b) Autocorrelation functions and memory effects ( $r(k) = 0.2$ ) of the discharge. c) Cross-  
255 correlations between discharge and precipitation, three different periods are shown, and d) cross-correlations  
256 between discharge and temperature.

257

258 Cross-correlation of discharge with precipitation and temperature showed opposing patterns. Discharge was  
259 positively correlated with precipitation, but negatively correlated with air temperature (Fig. 3c, d and Table S1).  
260 The discharge-precipitation correlogram shows three periods that coincide with peaks of the correlation function  
261 (Fig. 3c). Both streams show differences at each of these peaks: CP had higher correlation values ( $r_{\max}$ ) and  
262 lower lag times than G. Indeed, at CP the correlation reached its maximum the same day precipitation took place  
263 (lag = 0) during the first period, while  $r$  was not even significant for G at the time (Table S1). During the second  
264 period, correlation at CP reached an  $r_{\max}=0.36$  with a lag time of 34 days, while at G, correlation was lower  
265 ( $r_{\max}=0.19$ ) and the lag higher (lag = 40). The third, longest period presented a series of peaks and valleys, and  
266 lapsed from day 57 to day 110 after the precipitation event at CP and from day 62 to 142 at G. In contrast, the  
267 discharge-temperature correlogram did not show similar periods; cross-correlation was significant from day 0 to  
268 around day 90 for both streams (Fig. 3d, Table S1).

269

270 **Physical and chemical characteristics of the streams studied**

271 Although streams differed in the specific values, both had very low EC, turbidity, nutrient concentration and  
 272 nutrient export (Table 2). G showed the highest TP and TN concentrations (Fig. 4a, c) and exports (Fig. 4b, d):  
 273 CP exported 8.9 kg TP km<sup>-2</sup> year<sup>-1</sup> and 59.0 kg TN km<sup>-2</sup> year<sup>-1</sup>, while G exported 11.7 kg TP km<sup>-2</sup> year<sup>-1</sup> and 78.8  
 274 kg TN km<sup>-2</sup> year<sup>-1</sup> (approximately 35 % more N). No significant differences in TN:TP average ratios were found  
 275 (~15; Fig. 4e), although the median value of TN:TP was 11 for CP and 16 for G. As to the amount of CPOM  
 276 exported, no significant difference between streams was found. There were differences, however, in the quality  
 277 of exported material; native *N. pumilio* leaves dominated in CP, while introduced *S. fragilis* leaves dominated in  
 278 G. The peaks of CPOM export also differed among streams: highest export at CP was found during June and  
 279 July (samples #3-4), while at G this peak occurred earlier, in April (sample #2). In summary, the drainage basin  
 280 showing more anthropic land uses also showed higher nutrient export, with most CPOM export represented by  
 281 introduced tree species.  
 282

|                                                                                 | Casa de Piedra       | Gutiérrez           |
|---------------------------------------------------------------------------------|----------------------|---------------------|
| Temperature (°C)                                                                | 7.8 (3.7-12.5)       | 10.6 (6.0-16.8)     |
| Electrical Conductivity (µs cm <sup>-1</sup> )                                  | 43 (27-61)           | 74 (71-76)          |
| Turbidity (NTU)                                                                 | 0.2 (0.0-0.8)        | 0.7 (0.0-2.0)       |
| pH                                                                              | 7.8 (7.4-8.0)        | 7.9 (7.3-8.1)       |
| Total Phosphorus (mg m <sup>-3</sup> )                                          | 5 (2-9)              | 14 (10-18)          |
| Total Nitrogen (mg m <sup>-3</sup> )                                            | 29 (18-44)           | 94 (75-134)         |
| TN TP <sup>-1</sup> (molar)                                                     | 15 (6-31)            | 15 (11-21)          |
| Coarse Particulate Organic Matter (AFDW m <sup>-3</sup> )*10                    | 0.46 (0.04-1.86)     | 0.91 (0.02-8.76)    |
| Total Phosphorus export (kg km <sup>-2</sup> y <sup>-1</sup> )                  | 8.9 (1.7-26.4)       | 11.7 (3.8-22.6)     |
| Total Nitrogen export (kg km <sup>-2</sup> y <sup>-1</sup> )                    | 59.0 (8.2-134.2)     | 78.8 (27.4-186.0)   |
| Coarse Particulate Organic Matter export (kg km <sup>-2</sup> y <sup>-1</sup> ) | 1298.3 (13.3-7709.4) | 433.2 (15.1-3201.6) |

283 **Table 2** Average values, maximum and minimum in brackets, of the physical and chemical variables in the  
 284 streams (n=13, except for the Coarse particulate organic matter where n=12).

285  
 286

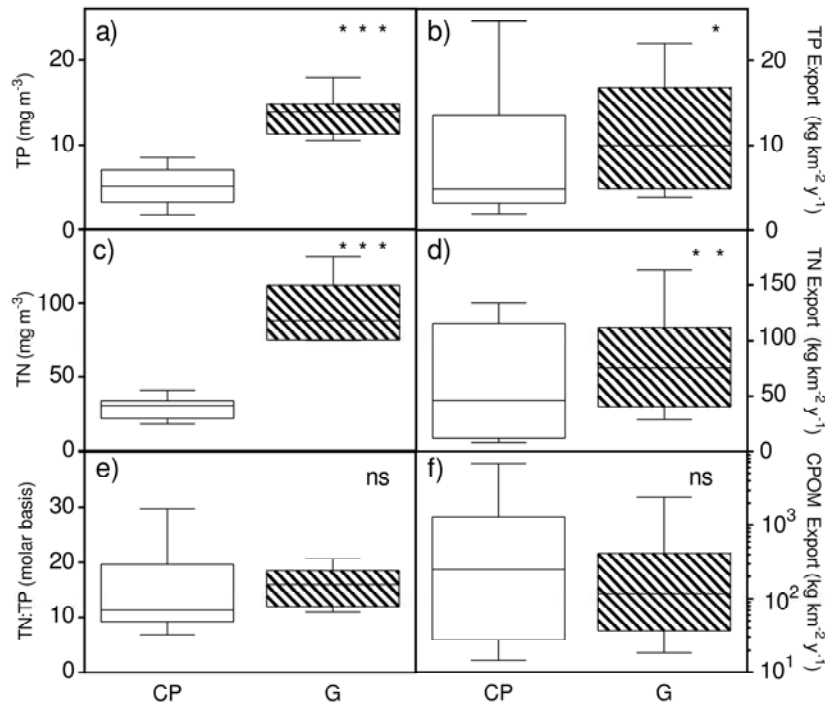

287

288 **Fig. 4** Box plot showing annual differences in nutrient concentration, ratio and export in Casa de Piedra (CP) and  
 289 Gutiérrez (G) streams (Paired T Test, \*  $P \leq 0.05$ ; \*\*  $P \leq 0.01$ ; \*\*\*  $P \leq 0.001$ ; ns: not significant). f) The Y axis  
 290 is in logarithmic scale. Total Phosphorus (TP), Total Nitrogen (TN) and Coarse Particulate Organic Matter  
 291 (CPOM).

292

293 Our PCA determined three Principal Component, FI, FII and FIII that respectively explain 33%, 24% and 13%  
 294 of the variance, accounting for 70% of the total variance (Table 3). FI was mainly related to discharge and  
 295 nutrient export ( $TP_{exp}$  and  $TN_{exp}$ ) (Fig. 5a). Positive FI values corresponded to samples with high discharge, high  
 296 nutrient export and high turbidity. The FII was mainly related to the EC of the water, and to a lesser extent with  
 297 water temperature and nutrient concentration (Fig. 5a). The FIII was mainly related to the TN:TP ratio, and to a  
 298 lesser extent with CPOM variables.

299

| Variable            | First Factor<br>(33%) | Second Factor<br>(24%) | Third Factor<br>(13%) |
|---------------------|-----------------------|------------------------|-----------------------|
| Temperature         |                       | 0.31                   |                       |
| EC                  |                       | 0.47                   |                       |
| Turbidity           | 0.35                  |                        |                       |
| Q                   | 0.38                  |                        |                       |
| TP                  | 0.35                  | 0.41                   |                       |
| TN                  | 0.36                  | 0.32                   |                       |
| TN TP <sup>-1</sup> |                       |                        | 0.55                  |
| CPOM                |                       |                        | -0.47                 |
| TP <sub>exp</sub>   | 0.42                  |                        |                       |
| TN <sub>exp</sub>   | 0.42                  |                        |                       |
| CPOM <sub>exp</sub> |                       | -0.35                  | -0.55                 |

300 **Table 3** Principal Component Analysis on physical and chemical variables. Factors are a linear combination of  
 301 the different variables. Percent of variance explained and factor loadings (> 0.30) are shown. Abbreviations are  
 302 as in Figure 5.

303

304 Both streams are clearly discriminated by PCA ordering, highlighting seasonal differences in each  
 305 stream (Fig. 5b). Besides separating samples from each stream, plotting FI versus FII shows that each stream is  
 306 temporally heterogeneous, allowing clustering in 3 groups for CP (CP<sub>A</sub>, CP<sub>B</sub> and CP<sub>C</sub>) and 2 for G (G<sub>A</sub> and G<sub>B</sub>)  
 307 (Fig. 5b). CP<sub>A</sub> had low discharge and export rate values and high temperatures, taking place at the warmest  
 308 period (Fig. 2). CP<sub>B</sub> had higher nutrient concentration and export values, matching the period with more  
 309 abundant precipitation (Fig. 2). CP<sub>C</sub> was mainly characterized by low EC, nutrient concentration and turbidity  
 310 values, and coincides with the period of diminishing rainfall and monotonic air temperature warming (Fig. 2).  
 311 G<sub>A</sub> had similar characteristics to CP<sub>A</sub> and spans the same period. The remaining samples fall within G<sub>B</sub>. Thus, the  
 312 values of physical and chemical variables sampled monthly through the year show that both streams have  
 313 marked seasonal differences that follow precipitation and air temperature patterns.

314

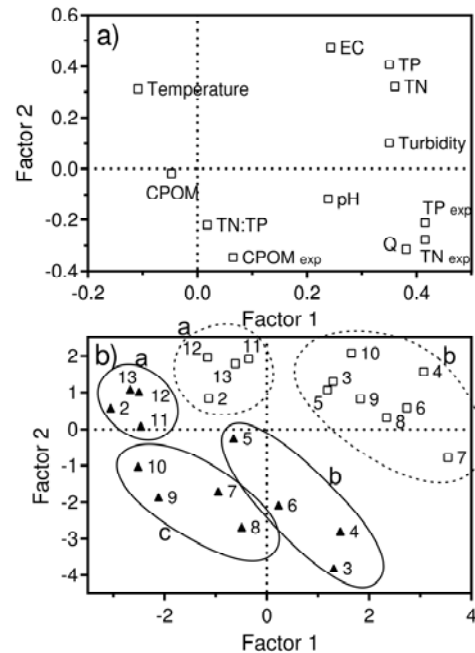

315

316 **Fig 5** Principal Component Analysis (PCA) of physical and chemical variables in the study streams. a) The  
317 weight of variables in each of the axes is shown. b) First factorial plane of the PCA, Casa de Piedra sampling  
318 dates are represented by triangles and Gutiérrez ones are represented by rectangles, the numbers correspond to  
319 the sampling dates and they are grouped by climatic characteristics of the region (a, b and c). Electrical  
320 conductivity (EC), Discharge (Q), Total Phosphorus (TP), Total Nitrogen (TN), Coarse Particulate Organic  
321 Matter (CPOM), Export (exp).

322

323

## 324 **DISCUSSION AND CONCLUSIONS**

325 We surveyed discharge and nutrient dynamics in two adjacent North Patagonian streams with contrasting  
326 drainage basins. Precipitation had a direct influence on the magnitude of stream discharge at both streams, but  
327 the response time varied between them. CP stream was flashy, showed a tighter relation between precipitation at  
328 the basin and discharge response and stronger seasonality of physical and chemical parameter values. G stream,  
329 in contrast, showed a more buffered discharge response to precipitation and higher nutrient exports. In general,  
330 similarities seen between streams can be related to regional climate, while differences are better explained by  
331 contrasting topography and land use of the respective drainage basins.

332 Precipitation and temperature have opposite influence in river discharge in the Andean region  
333 (Masiokas et al. 2008). In this way, precipitation increased stream discharge of our study sites, while elevated air  
334 temperature periods produced the opposite effect. The different pathways taken by precipitated water to reach



335 the streams (run-off, groundwater and snowmelt) (Brown et al. 2003) and their relative importance are evidenced  
336 by the three periods found in the discharge-precipitation correlogram. Surface run-off was more relevant at CP, a  
337 stream that feeds from run-off from a basin characterized by steep slopes and the lack of buffering from a large  
338 upstream lake. In this stream, discharge increased drastically during the same day precipitation occurred, and the  
339 following days. Water that does not reach the stream immediately as run-off, infiltrates into the soil and moves  
340 to the stream as sub-surface run-off or groundwater; these pathways usually results in a delayed stream discharge  
341 response (Kalff 2002). This delay time was close to a month for both streams; this similarity suggests that both  
342 basins share the same subsurface geological traits, and thus that geology drives groundwater dynamics. The sub-  
343 surface run-off and groundwater pathways were also more relevant at CP, which showed a higher  $r(max)$  and  
344 shorter delay times. In colder regions, snow precipitation is stored during the winter months and released as  
345 snowmelt in spring and summer (Bailey 1995). This results in a delay time between precipitation and discharge  
346 response of about 2-4 months, as we found at both study sites during spring. Such discharge dynamics and its  
347 relationship with the fractions of precipitation fallen as either rain or snow match the storm and melt periods  
348 described at other mountainous regions (Ahearn et al. 2004).

349 The presence of a headwater lake in the drainage basin regulates the flow regime of a stream (Baker et  
350 al. 2004). This was made evident by the contrasting values of discharge autocorrelation and flashiness R-B  
351 indices between the streams in our study. The autocorrelation function fell sharply for CP but sloped more  
352 gently for G, showing a shorter memory effect (Mangin 1984) in CP, and agreeing with differences in annual  
353 values of the R-B index. Flashiness values seen at CP (R-B = 0.14) are similar to those found for streams at  
354 Austria (R-B = 0.18) and Slovakia (R-B = 0.15) that flow through basins with steep slopes and small area  
355 (Holko et al. 2011). In contrast, flashiness at G was much lower (R-B=0.03), and more akin the values found for  
356 streams with regulated flows at Indiana, USA (Baker et al. 2004). Thus, the difference in flashiness between the  
357 adjacent streams we studied is explained by the contrasting topography of their drainage basins, including the  
358 presence of a large lake in one but not the other.

359 Leaves of riparian trees are generally the largest component of allochthonous inputs to stream located in  
360 forested drainage basins and are often the major source of energy to heterotrophic organisms (Vannote et al.  
361 1980; Webster et al. 1999). In the case of Andean streams, *N. pumilio* leaves cover large areas of the waterway  
362 during autumn (Albariño et al. 2009). A substantial amount of these may be transported downstream by spates  
363 occurring from late autumn to winter and eventually reaches the lake (Modenutti et al. 2010). We observed no  
364 significant differences in the amount of CPOM exported by the two streams studied. However, we highlight the

365 fact that in stream CP the CPOM was mainly made up of native *N. pumilio* leaves, while in stream G introduced  
366 *S. fragilis* leaves dominated. This corresponds to the tree species present in the different catchments, and could  
367 explain the temporal difference between streams in the surge of CPOM; the peak in CPOM export occurred  
368 during June and July in stream CP, and during April in stream G. This supports the claim that afforestation or  
369 invasion of exotic plants with different phenology, chemical and physical characteristics to those of the native  
370 riparian species changes the timing, quantity and quality of leaf litter standing stock in streams (Naiman et al.  
371 2005).

372 Streams in the north Patagonian region are oligotrophic (Pedrozo et al. 1993; García et al. 2015b). The  
373 concentration and the annual export rate of the nutrients from CP stream reflected this characteristic. Values of N  
374 and P concentrations were lower to those measured in a forested nearby sub-catchment (TN = 110.6  $\mu\text{g l}^{-1}$  and  
375 TP = 9.6  $\mu\text{g l}^{-1}$ ) while they were much smaller than those found in a burned sub-catchment of this region (TN =  
376 675.1  $\mu\text{g l}^{-1}$  and TP = 12.0  $\mu\text{g l}^{-1}$ ) (Temporetti 2006). Values of N export were lower to those measured in areas  
377 of low anthropogenic impact in Patagonia (average TN export = 100  $\text{kg km}^{-2} \text{ year}^{-1}$ ) (Little et al. 2008), and  
378 values of P export were between the lowest measured in South America (TP export range from 4 to 450  $\text{kg TP}$   
379  $\text{km}^{-2} \text{ year}^{-1}$ ) (Álvarez-Cobelas & Angeler 2007). These results indicate that nutrient export in CP river ecosystem  
380 is among the lowest measured for any basin worldwide (Álvarez-Cobelas et al. 2008; Álvarez-Cobelas et al.  
381 2009). However, it should be taken into account that we have estimated basal nutrient export rates because we  
382 measured them in days without precipitation, when their export tend to be low (Tate & Singer 2013). In any  
383 case, it is interesting to note that these rates were higher for stream G than for CP, even though the opposite  
384 result could have been expected, given that headwater lakes act as nutrient and sediment traps (Parker et al.  
385 2009). The higher nutrient concentration seen at G is thus not explained by natural causes, but by the effects of  
386 land use in its drainage basin, namely the presence of human settlements and trout farms.

387 Increases in eutrophication levels of river ecosystems is due to both point and diffuse sources  
388 (Carpenter et al. 1998). While we did not formally weigh the relative impacts of fish farming and urbanization,  
389 we suspect that a growing residential settlement of the Gutiérrez stream drainage basin, often times without  
390 adequate wastewater treating infrastructure, is expected to have a larger impact than the detritus from fish farms  
391 producing ~3 tons of fish per year. This is partially supported by nutrient measurements at G stream during the  
392 low water period where dissolved inorganic nitrogen export ( $\text{DIN}_{\text{exp}}$ ) was measured downstream the larger fish  
393 farm ( $\text{DIN}_{\text{exp}} = 7 \text{ kg km}^{-2} \text{ year}^{-1}$ ) and at its mouth ( $\text{DIN}_{\text{exp}} = 108 \text{ kg km}^{-2} \text{ year}^{-1}$ ) (Sosnovsky, unpublished results).  
394 Moreover, the additional nutrient sources of fish food and feces from salmonid production decrease the TN:TP

395 ratio of the water column in Patagonia reservoirs (Diaz et al. 2001), a fact we did not observe in G stream.  
396 However, a more detailed spatial study in G drainage basin aimed to determine the sources and sinks of total and  
397 dissolved nutrients associated to eutrophication processes is still necessary.

398 The molecular N:P ratio is said to distinguish nitrogen-limited systems from those constrained by  
399 phosphorus (Rhee & Gotham 1980). Kahlert (1998), in a review of the literature, found that the optimal N:P ratio  
400 of freshwater benthic algae was 18:1 (molar), which deviates from the phytoplankton optimal stoichiometric N:P  
401 ratio of 16:1 (Redfield ratio) (Goldman et al. 1979). CP and G streams had an arithmetic mean N:P molar ratio  
402 close to 15, which would indicate nitrogen deficit in these ecosystems, similar to what has been observed in  
403 other ecosystems of Northern Patagonia, either forests (Satti et al. 2003) or lakes (Diaz et al. 2007). However,  
404 considering that median values of N:P were 11 for CP and 16 for G, it becomes evident that nitrogen limitation is  
405 being lifted at G, most likely due to wastewater leaching from human settlements. An increase in the N load is  
406 expected to result in increased eutrophication of the G stream and downstream water bodies. Thus, it would be  
407 advisable to build adequate wastewater treatment plants to avoid driving these, up until now, low impact  
408 drainage basins towards ecosystem eutrophication. Our findings at the drainage basin level are in line with  
409 observations at the global scale suggesting human actions generate a clear unbalance favoring N over P  
410 (Peñuelas et al. 2013).

411 By studying two Andean streams located at adjacent, yet contrasting drainage basins, we were able to  
412 investigate the influence of environmental factors acting at different spatial scales over these freshwater  
413 ecosystems. At a regional scale, climate determined seasonality of water flow for both streams. At a landscape  
414 scale, we found that the presence of a large, deep lake buffered the hydrological dynamic of its effluent stream.  
415 At a lower spatial scale, we found that more intense human impact at G's drainage basin correlated with higher  
416 nutrient export rates by the stream. Considering the strong demographic pressure at G's drainage basin, there is a  
417 high risk of change in N:P stoichiometry and ecosystem eutrophication. Gutiérrez basin situation thus shows a  
418 stark contrast to Casa de Piedra basin, which instead has the hydrological, physical and chemical dynamics of a  
419 pristine drainage basin characteristics of Andean streams originating at high altitude wetlands and small lakes  
420 (Sosnovsky et al. 2019). Besides geomorphology, the main differences between both basins are land use policies:  
421 CP's basin is mostly within protected areas, while most of G's lower basin is within the limits of San Carlos de  
422 Bariloche city and subject to several, potentially high impact uses, like residential neighborhoods, winter sports  
423 and fish farming, among others. Local and global environmental problems are currently burning issues in stream  
424 ecosystem processes and will be even more so in the future. Considering that lakes and streams are sentinels and

425 integrators of environmental change in the surrounding terrestrial landscape (Williamson et al. 2008), it is really  
426 important to monitor the key variables of these aquatic ecosystems (Lovett et al. 2007) and emphasize the  
427 preservation and restoration of their drainage basins.

428

#### 429 **Author contributions**

430 Alejandro Sosnovsky performed the study conception and design. All authors contributed to the material  
431 preparation, data collection and analysis. The first draft was written by Sosnovsky, Alejandro and all authors  
432 commented on previous versions of the manuscript. All authors read and approved the final manuscript.

433

#### 434 **REFERENCES**

- 435 A.P.H.A., 2005. Standard methods for examination of water and wastewater, 21 edn. American Public Health  
436 Association, Washington DC.
- 437 Ahearn, D. S., R. W. Sheibley, R. A. Dahlgren & K. E. Keller, 2004. Temporal dynamics of stream water  
438 chemistry in the last free-flowing river draining the western Sierra Nevada, California. *Journal of Hydrology*  
439 295: 47-63.
- 440 Albariño, R. J., V. Díaz Villanueva & L. Buria, 2009. Leaf litter dynamics in a forested small Andean catchment,  
441 northern Patagonia, Argentina. In Oyarzún, C., N. E. C. Verhoest, P. Boeckx & R. Godoy (eds), *Ecological*  
442 *advances on Chilean temperate rainforest*. Academia Press, 183-211.
- 443 Álvarez-Cobelas, M. & D. G. Angeler, 2007. Exportación de nutrientes en las cuencas hidrográficas de  
444 Latinoamérica: una recopilación. *Revista Latinoamericana de Recursos Naturales* 3: 31-43.
- 445 Álvarez-Cobelas, M., D. G. Angeler & S. Sánchez-Carrillo, 2008. Export of nitrogen from catchments: A  
446 worldwide analysis. *environmental Pollution* 156: 261-269.
- 447 Álvarez-Cobelas, M., S. Sánchez-Carrillo & D. G. Angeler, 2009. Phosphorus export from catchments: a global  
448 view. *Journal of American Benthological Society* 28: 805-820.
- 449 Allan, J. D., 2004. *Landscapes and Riverscapes: The influence of land use on stream ecosystems*. Annual  
450 *Review of Ecology, Evolution and Systematics* 35: 257-284.
- 451 Bailey, R. G., 1995. *Ecosystem Geography*. Springer-Verlag, New York, New York.
- 452 Baker, D. B., R. P. Richards, T. T. Loftus & J. W. Kramer, 2004. A new flashiness index: Characteristics and  
453 applications to midwestern rivers and streams. *Journal of the American Water Resources Association* 40:  
454 503-522.

- 455 Barros, V. & I. Camilloni, 2016. La Argentina y el cambio climático De la física a la política, 1<sup>st</sup> edn. EUDEBA,  
456 Ciudad Autónoma de Buenos Aires.
- 457 Brown, L. E., D. M. Hannah & A. M. Milner, 2003. Alpine Stream Habitat Classification: An Alternative  
458 Approach Incorporating the Role of Dynamic Water Source Contributions. *Arctic, Antarctic, and Alpine*  
459 *Research* 35: 313-322.
- 460 Carpenter, S. R., N. F. Caraco, D. L. Correll, R. W. Howarth, A. N. Sharpley & V. H. Smith, 1998. Nonpoint  
461 Pollution of Surface Waters with Phosphorus and Nitrogen. *Ecological Applications* 8: 559-568.
- 462 Carrillo, U., V. Díaz Villanueva & B. E. Modenutti, 2018. Sustained effects of volcanic ash on biofilm  
463 stoichiometry, enzyme activity and community composition in North-Patagonia streams. *Science of the Total*  
464 *Environment* 621: 235-244.
- 465 Di Rienzo, J. A., F. Casanoves, M. G. Balzarini, M. González, M. Tablada & C. W. Robledo, 2016. InfoStat.  
466 2016 edn. Universidad Nacional de Córdoba.
- 467 Diaz, M. M., F. L. Pedrozo, C. S. Reynolds & P. F. Temporetti, 2007. Chemical composition and the nitrogen-  
468 regulated trophic state of Patagonian lakes. *Limnologica* 37: 17-27.
- 469 Diaz, M. M., P. F. Temporetti & F. L. Pedrozo, 2001. Response of phytoplankton to enrichment from cage fish  
470 farm waste in Alicura Reservoir (Patagonia, Argentina). *Lake & Reservoir Management* 6: 151-158.
- 471 Díaz Villanueva, V., M. Bastidas Navarro & R. Albariño, 2016. Seasonal patterns of organic matter  
472 stoichiometry along a mountain catchment. *Hydrobiologia*.
- 473 Diehl, L., M. J. Mazzarino, F. Funes, S. Fontenla, M. Gobbi & J. Ferrari, 2003. Nutrient conservation strategies  
474 in native Andean-Patagonian forests. *Journal of Vegetation Science* 14: 63-70.
- 475 Dodds, W. K. & V. H. Smith, 2016. Nitrogen, phosphorus, and eutrophication in streams. *Inland Waters* 6: 155-  
476 164.
- 477 Emerson, D. G., A. V. Vecchia & A. L. Dahl, 2005. Evaluation of Drainage-Area Ratio Method Used to  
478 Estimate Streamflow for the Red River of the North Basin, North Dakota and Minnesota. In: 5017, S. I.-.  
479 (ed). U.S. Geological Survey, Reston, Virginia, 18.
- 480 Fongers, D., R. Day & J. Rathbun, 2012. Application of the Richards-Baker Flashiness Index to gaged Michigan  
481 rivers and Streams. Water Resources Division, Michigan Department of Environmental Quality, Lansing, 1-  
482 141.

- 483 García, D. R., M. C. Diéguez, M. Gereá & P. E. García, 2018. Characterisation and reactivity continuum of  
484 dissolved organic matter in forested headwater catchments of Andean Patagonia. *Freshwater Biology* 63:  
485 1049-1062.
- 486 García, P., M. C. Diéguez & C. P. Queimaliños, 2015a. Landscape integration of North Patagonian mountain  
487 lakes: a first approach using characterization of dissolved organic matter. *Lakes & Reservoirs: Research and*  
488 *Management* 20: 1-14.
- 489 García, R. D., M. Reissig, C. P. Queimaliños, P. E. García & M. C. Diéguez, 2015b. Climate-driven terrestrial  
490 inputs in ultraoligotrophic mountain streams of Andean Patagonia revealed through chromophoric and  
491 fluorescent dissolved organic matter. *Science of the Total Environment* 521-522: 280-292.
- 492 Goldman, J. C., J. J. Mc Carthy & D. G. Peavey, 1979. Growth rate influence on the chemical composition of  
493 phytoplankton in oceanic waters. *Nature* 279: 210-215.
- 494 Gordon, N. D., T. A. McMahon, C. J. Gippel & R. J. Natha, 2004. *Stream Hydrology An Introduction for*  
495 *Ecologist*. John Wiley & Sons LTD, Chichester, England.
- 496 Grasshoff, M., K. Ehrhardt & K. Kremling, 1983. *Methods of seawater analysis*. Wiley, New York.
- 497 Hedin, L. O., J. J. Armesto & A. H. Johnson, 1995. Patterns of Nutrient Loss from Unpolluted, Old-Growth  
498 Temperate Forests: Evaluation of biogeochemical theory. *Ecology* 76: 493-509.
- 499 Hintze, J. L., 1998. *Number Cruncher Statistical System (NCSS). Version 2000. User's Guide*. Kaysville, Utah.
- 500 Holko, L., J. Parajka, Z. Kostka, P. Skoda & G. Blöschl, 2011. Flashiness of mountain streams in Slovakia and  
501 Austria. *Journal of Hydrology* 405: 392-401.
- 502 Holland, E. A., F. J. Dentener, B. H. Braswell & J. M. Sulzman, 1999. Contemporary and pre-industrial global  
503 reactive nitrogen budgets. *Biogeochemistry* 46: 7-43.
- 504 Howarth, R. W., G. Billen, D. Swaney, A. Townsend, N. A. Jaworski, K. Lajtha, J. A. Downing, R. Elmgren, N.  
505 Caraco, T. Jordan, F. Berendse, J. Freney, V. Kudeyarov, P. Murdoch & Z. L. Zhu, 1996. Regional nitrogen  
506 budgets and riverine N & P fluxes for the drainages to the North Atlantic Ocean: natural and human  
507 influences. *Biogeochemistry* 35: 75-139.
- 508 Hynes, H. B. N., 1975. The stream and its valley. *SIL, Proceedings, 1922-2010* 19: 1-15.
- 509 Jordan, T. E., D. L. Correll & D. E. Weller, 1997. Effects of agriculture on discharges of nutrients from coastal  
510 plain watersheds of Chesapeake Bay. *Journal of Environmental Quality* 26: 836-848.
- 511 Kahlert, M., 1998. C:N:P ratios of freshwater benthic algae. *Archiv für Hydrobiologie, Special Issues, Advances*  
512 *in Limnology* 51: 105-114.

- 513 Kalf, J., 2002. Hidrology and Climate. In Ryu, T. (ed) Limnology Inland Water Ecosystems. Prentice Hall,  
514 Upper Saddle River, 53-71.
- 515 Lallement, M., P. J. Macchi, P. H. Vigliano, S. Juarez, M. Rechencq, M. Baker, N. Bouwes & T. A. Crowl,  
516 2016. Rising from the ashes: Change in salmonid fish assemblages after 30 months of the Puyehue-Cordon  
517 Caulle volcanic eruption. *Science of the Total Environment* 541: 1041-1051.
- 518 Larocque, M., A. Mangin, M. Razack & O. Banton, 1998. Contribution of correlation and spectral analyses to  
519 the regional study of a large karst aquifer (Charente, France). *Journal of Hydrology* 205: 217-231.
- 520 Likens, G. E., 1985. *An Ecosystem Approach to Aquatic Ecology. Mirror Lake and Its Environment*. Springer-  
521 Verlag, New York.
- 522 Little, C., D. Soto, A. Lara & J. G. Cuevas, 2008. Nitrogen exports at multiple-scales in a southern Chilean  
523 watershed (Patagonian Lakes district). *Biogeochemistry* 87: 297-309.
- 524 Lovett, G. M., D. A. Burns, C. T. Driscoll, J. C. Jenkins, M. J. Mitchell, L. Rustad, J. B. Shanley, G. E. Likens &  
525 R. Haeuber, 2007. Who need environmental monitoring? *Frontiers in Ecology and the Environment* 5: 253-  
526 260.
- 527 Mangin, A., 1984. Pour une meilleure connaissance des systèmes hydrologiques à partir des analyses  
528 corrélatoire et spectrale. *Journal of Hydrology* 67: 25-43.
- 529 Masiokas, M. H., R. Villalba, B. H. Luckman, M. E. Lascano, S. Delgado & P. Stepanek, 2008. 20th-century  
530 recession and regional hydroclimatic changes in northwestern Patagonia. *Global and Planetary Change* 60:  
531 85-100.
- 532 Mermoz, M. & C. Martín, 1987. Mapa de vegetación de la Reserva y del Parque Nacional Nahuel Huapi.  
533 Administración de Parques Nacionales, Delegación Técnica Regional Patagonia, San Carlos de Bariloche,  
534 23.
- 535 Merseburger, G. C., E. Martí & F. Sabater, 2005. Net changes in nutrient concentrations below a point source  
536 input in two streams draining catchments with contrasting land uses. *Science of the Total Environment* 347:  
537 217-229.
- 538 Meyer, J. L., M. J. Paul & W. K. Taulbee, 2005. Stream ecosystem function in urbanizing landscapes. *Journal of*  
539 *the North American Benthological Society* 24: 602-612.
- 540 Miserendino, M. L., M. A. Kutschker, C. Brand, L. La Manna, Y. C. Di Prinzio, G. Papazian & J. Bava, 2016.  
541 Ecological Status of a Patagonian Mountain River: Usefulness of Environmental and Biotic Metrics for  
542 Rehabilitation Assessment. *Environmental Management* 57: 1166-1187.

- 543 Modenutti, B. E., R. J. Albariño, M. Bastidas Navarro, V. D. Villanueva, A. F. Souza, C. Trochine, C.  
544 Laspoumaderes, F. Cuassolo, G. Mariluán, L. Buria & E. G. Balseiro, 2010. Structure and dynamic of food  
545 webs in Andean North Patagonian freshwater systems: organic matter, light and nutrient relationships.  
546 *Ecología Austral* 20: 95-114.
- 547 Naiman, R. J., H. Décamps & M. E. McClain, 2005. *Riparia: ecology, conservation and management of*  
548 *streamside communities*. Elsevier Academic Press, London, UK.
- 549 Oyarzún, C. E., R. Godoy, A. Schrijver De, J. Staelens & N. Lust, 2004. Water chemistry and nutrient budgets in  
550 an undisturbed evergreen rainforest of souther Chile. *Biogeochemistry* 71: 107-123.
- 551 Oyarzún, C. E., R. Godoy & A. Sepulveda, 1998. Water and nutrient fluxes in a cool temperate rainforest at the  
552 Cordillera de la Costa in southern Chile. *Hydrological Processes* 12: 1067-1077.
- 553 Parker, B. P., D. E. Schindler, K. G. Beaty, M. P. Stainton & S. E. M. Kasian, 2009. Long-term changes in  
554 climate, streamflow, and nutrient budgets for first-order catchments at the Experimental Lakes Area (Ontario,  
555 Canada). *Canadian Journal of Fisheries and Aquatic Sciences* 66: 1848-1863.
- 556 Paruelo, J. M., A. Beltran, E. Jobbágy, O. Sala & R. Golluscio, 1998. The climate of Patagonia: general patterns  
557 and controls on biotic processes. *Ecología Austral* 8: 85-101.
- 558 Pedrozo, F. L., S. Chillrud, P. F. Temporetti & M. M. Diaz, 1993. Chemical composition and nutrient limitation  
559 in rivers and lakes of northern Patagonian Andes (39.5°-42° S; 71° W) (Rep. Argentina). *SIL Proceedings*,  
560 1922-2010 25: 207-214.
- 561 Peel, M. C., B. L. Finlayson & T. A. McMahon, 2007. Updated world map of the Köppen-Geiger climate  
562 classification. *Hydrology and Earth System Sciences* 4: 439-473.
- 563 Peltier, M. R., C. J. Wilcox & D. C. Sharp, 1998. Technical Note: Application of the Box-Cox data  
564 transformation to animal science experiments. *Journal of Animal Science* 78: 847-849.
- 565 Peñuelas, J., B. Poulter, J. Sardans, P. Ciais, M. van der Velde, L. Bopp, O. Boucher, Y. Godderis, P. Hinsinger,  
566 J. Llusia, E. Nardin, S. Vicca, M. Obersteiner & I. A. Janssens, 2013. Human-induced nitrogen–phosphorus  
567 imbalances alter natural and managed ecosystems across the globe. *Nature Communications* 4: 2934.
- 568 Pieterse, N. M., W. Bleuten & S. E. Jørgensen, 2003. Contribution of point sources and diffuse sources to  
569 nitrogen and phosphorus loads in lowland rivers tributaries. *Journal of Hydrology* 271: 213-225.
- 570 Pozo, J., A. Elosegí, J. Díez & J. Molinero, 2009. Dinámica y relevancia de la materia orgánica. In Elosegí, A. &  
571 S. Sabater (eds), *Conceptos y técnicas en ecología fluvial*. Fundación BBVA, Bilbao, España, 141-166.



- 572 Rhee, G. Y. & I. J. Gotham, 1980. Optimum N:P ratios and co-existence of planktonic algae. *Journal of*  
573 *Phycology* 16: 486-489.
- 574 Satti, P., M. J. Mazzarino & M. Gobbi, 2003. Soil N dynamics in relation to leaf litter quality and soil fertility in  
575 north-western Patagonian forests. *Journal of Ecology* 91: 173-181.
- 576 Snelder, T. H. & B. J. F. Biggs, 2002. Multiscale river environment classification for water resources  
577 management. *Journal of the American Water Resources Association* 38: 1225-1239.
- 578 Sosnovsky, A., M. Rechencq, V. Fernández, M. J. Suarez & R. J. C. Cantet, 2019. Hydrological and Physico-  
579 chemical dynamics in two Andean streams. *Limnetica* in press.
- 580 Tate, K. W. & M. J. Singer, 2013. Timing, Frequency of Sampling Affect Accuracy of Water-Quality  
581 Monitoring. *California Agriculture* 53: 44-48.
- 582 Temporetti, P. F., 2006. Efecto a largo plazo de los incendios forestales en la calidad del agua de dos arroyos en  
583 la sub-región Andino-Patagónica, Argentina. *Ecología Austral* 16: 157-166.
- 584 Vannote, R. L., G. W. Minshall, K. W. Cummins, J. R. Sedell & C. E. Cushing, 1980. The River Continuum  
585 Concept. *Canadian Journal of Fisheries and Aquatic Sciences* 37: 130-137.
- 586 Veblen, T. T., R. S. Hill & J. Read (eds), 1996. The ecology and biogeography on Nothofagus forests. Yale  
587 University Press, London, UK.
- 588 Walsh, C. J., T. D. Fletcher & A. R. Ladson, 2005. Stream restoration in urban catchments through redesigning  
589 stormwater systems: looking to the catchment to save the stream. *Journal of the North American*  
590 *Benthological Society* 24.
- 591 Webster, J. R., E. F. Benfield, T. P. Ehrman, M. A. Schaeffer, J. L. Tank, J. J. Hutchens & D. J. D'angelo, 1999.  
592 What happens to allochthonous material that falls into streams? A synthesis of new and published  
593 information from Coweeta. *Freshwater Biology* 41: 687-705.
- 594 Wiens, J. A., 2002. Riverine landscapes: taking landscape ecology into the water. *Freshwater Biology* 47: 501-  
595 515.
- 596 Williams Subiza, E. A. & C. Brand, 2018. Short-term effect of wildfire on Patagonian headwater streams.  
597 *International Journal of Wildland Fire* 27: 457-470.
- 598 Williamson, C. E., W. K. Dodds, T. K. Kratz & M. A. Palmer, 2008. Lakes and streams as sentinels of  
599 environmental change in terrestrial and atmospheric processes. *Frontiers in Ecology and the Environment* 6:  
600 247-254.
- 601
